22 **A facile green synthesis approach to silver nanoparticles using calyx from *Abelmoschus***  
23 ***esculentus* and its anthelmintic activity**

24 Rima Majumdar, Pradip Kumar Kar\*

25 Parasitology Laboratory, Department of Zoology, Cooch Behar Panchanan Barma University, Cooch  
26 Behar, West Bengal, India

27 \*Corresponding author: karpradip@gmail.com

28 **Abstract**

29 In recent years, technology pertaining to nanobiomaterials has taken rapid strides, with the development  
30 of novel materials having unique properties. Silver nanoparticles (AgNPs) have gained attention among  
31 these materials due to their high chemical stability, surface-to-volume ratio, and strong antimicrobial  
32 activity. The traditional method for synthesizing AgNPs involves toxic chemicals, which can have  
33 negative environmental impacts and pose health risks. Hence, there is a growing need for green  
34 synthesis methods for AgNPs that are environmentally friendly and safe for animal and human health.  
35 In this study, we explore the green synthesis of AgNPs using calyx from *Abelmoschus esculentus*, also  
36 known as okra, as an anthelmintic. *Raillietina* spp. is a common poultry parasite causing significant  
37 economic losses to the livestock industry. It is a major cause of ailment and mortality in livestock,  
38 deterring the host health. While chemical-based anthelmintic drugs are available, the increasing  
39 prevalence of drug-resistant parasite strains has made searching for new and effective treatments  
40 imperative. Although ethnomedicine has been promising for treating various diseases, including  
41 parasitic infections, nanoparticles have emerged as a viable alternative to traditional anthelmintic  
42 curative development. Our study aims at investigating the recent advances in nanomedicine, particularly  
43 AgNPs, as anthelmintic agents, which has shown remarkable alterations in the levels of tegumental  
44 enzymes, eventually leading to their paralysis and death. We discuss the mechanisms of action of  
45 AgNPs against *Raillietina* spp. and highlight the potential benefits of using biosynthesized curatives  
46 that interfere with the host-parasite interface to treat parasite-related disorders.

47 **Keywords:** *Nanotechnology, green chemistry, anthelmintic, silver nanoparticle, cestode, histochemical*  
48 *localization*

## 49 1. Introduction

50 Nanomedicine is a promising field that has the potential to transform the way we approach medical  
51 treatments. However, the traditional method for synthesizing AgNPs involves toxic chemicals, which  
52 can have negative environmental impacts and pose health risks (Mubayi et al., 2012; Rajeshkumar and  
53 Bharath, 2017). To address these concerns, several studies have explored new methods for synthesizing  
54 AgNPs that are environment-friendly and safe for human health (Mamillapalli, 2016; Rai et al., 2022).  
55 Green synthesis of nanoparticles from natural sources has emerged as an eco-friendly and sustainable  
56 approach to producing nanoparticles with various applications in diverse fields. Previous studies have  
57 reported AgNP synthesis from diverse plants to explore their antimicrobial properties (Juan Carlos et  
58 al., 2020; Ogunsona et al., 2020; Spirescu et al., 2021). Additionally, AgNPs have shown potential for  
59 broader spectrum activity and are effective against drug-resistant strains of microorganisms  
60 (Namivandi-Zangeneh et al., 2021). *Abelmoschus esculentus*, commonly known as okra, has been used  
61 in traditional ethnomedicine in many cultures and passed down through generations to treat various  
62 health conditions. Okra pod is believed to have respiratory benefits and is used to treat respiratory  
63 ailments such as asthma (Romdhane et al., 2020). It has been conventionally used to treat digestive  
64 disorders such as diarrhea and gastrointestinal inflammation (Alves et al., 2018). Several reports have  
65 shown its significant effect on treating conditions such as arthritis and joint pain, promoting  
66 cardiovascular health through cholesterol-lowering effects, and helping manage blood sugar levels  
67 (Elkhalifa et al., 2021; Liu et al., 2021). The okra plant contains several bioactive compounds, including  
68 flavonoids, polyphenols, and tannins, which have been reported to exhibit significant antimicrobial  
69 activity (Yora et al., 2018). Indeed, okra extract-assisted  $\text{CoFe}_2\text{O}_4$  nanoparticles are proven to have  
70 significantly high antimicrobial activity against bacteria and fungal strains (Kombaiah et al., 2018).

71 In developing countries like India, gastrointestinal helminths lead to substantial health problems in  
72 poultry, including weight loss, stunted growth, reduced egg production, and even death in severe cases  
73 (Sarba et al., 2019). *Raillietina* is a genus of parasites belonging to the class Cestoda, order

74 Cyclophyllidea, and family Davaineidae, that commonly infects the intestines of birds and mammals,  
75 including domestic poultry. Several anthelmintic drugs are used to treat parasitic infestation for  
76 *Raillietina* spp. include piperazine, fenbendazole, and levamisole. Piperazine paralyzes the tapeworms,  
77 causing them to lose their grip on the gut wall and be expelled from the host's body (Amemor et al.,  
78 2021). The tegument of *Raillietina* performs vital functions such as nutrient absorption and secretion  
79 by functioning as a physical barrier against the host immune system (Hrckova et al., 2013).  
80 Fenbendazole is a broad-spectrum anthelmintic effective against a wide range of parasitic worms,  
81 including *Raillietina* and works by inhibiting the tapeworm's ability to absorb glucose, causing it to  
82 starve and eventually die (Saemi Soudkolaei et al., 2021). Levamisole is another anthelmintic drug  
83 commonly used to treat *Raillietina* infections by stimulating the host's immune system to attack and  
84 reduce the tapeworm burden (Gao et al., 2021). However, the prolonged unregulated use of such  
85 synthetic anthelmintics has been associated with developing resistance in parasites (Zahedi et al., 2022).  
86 Previous studies revealed a range of ethnomedicinal anthelmintics used to treat *Raillietina* spp.; these  
87 included plant-based remedies, such as Neem (*Azadirachta indica*), Wormwood (*Artemisia annua*), and  
88 Aloe vera (*Aloe barbadensis miller*), as well as animal-based remedies, such as bee venom (Ash et al.,  
89 2017; Shelke et al., 2020; Verbitskaya and Olechnovich, 2007). Several ethnomedicinal studies  
90 confirmed these remedies to treat parasitic infections in rural communities, which exhibited potent  
91 anthelmintic activity against *Raillietina* spp. (Giri et al., 2021). Kar et al. previously reported the *in*  
92 *vitro* anthelmintic activity of gold nanoparticles from the fungus *Nigrospora oryzae* on cestode  
93 parasites. They observed changes in enzyme activity and disruption of the parasite's tegument following  
94 treatment with gold nanoparticles (Kar et al., 2014).

95 In the current investigation, we focus on the anthelmintic activity of AgNPs synthesized from *A.*  
96 *esculentus* against *Raillietina* spp., a common intestinal parasite of poultry birds (*Gallus gallus*  
97 *domesticus*). We report the anthelmintic activities of the biosynthesized AgNPs against *Raillietina* spp.  
98 using several approaches, including histochemical and ultrastructural studies, which present a  
99 promising avenue for developing sustainable and effective anticestodal agents.

## 100 **2. Materials and Methods**

## 101 **2.1. Collection of plant material**

102 *Abelmoschus esculentus* was collected from the adjacent agricultural land near the Cooch Behar  
103 Panchanan Barma University campus (latitude 26.32213 °N, longitude 89.46015 °E). The taxonomical  
104 voucher specimen (Ac-97299) is submitted to the herbarium of the Botanical Survey of India, Eastern  
105 Regional Centre, Shillong.

## 106 **2.2. Preparation of plant extract using calyx of *A. esculentus***

107 The okra pods were washed twice with deionized water, air-dried, chopped and separated from the  
108 calyces. Chopped calyces (20 g) were placed in a beaker with 100 ml deionized water and heated in a  
109 temperature-controlled water bath for 10 minutes at 90°C. Once cooled down, the extract was filtered  
110 (Whatman paper No. 1 filter paper) and kept at a temperature of 4°C until it was needed again.

## 111 **2.3 Phytochemical screening**

112 Preliminary phytochemical screening for principal secondary metabolites of the okra calyces was  
113 conducted using the standard qualitative methods with the slightest modifications (Nortjie et al., 2022;  
114 Shaikh and Patil, 2020). The extract was investigated for the potential biomolecules associated with  
115 reducing silver ions to silver atoms. Phytochemical characterization was performed qualitatively for  
116 alkaloids, flavonoids, saponins, glycosides, steroids, tannins, terpenoids and proteins.

## 117 **2.4 Biosynthesis of *A. esculentus* silver nanoparticles (AE-AgNP)**

118 To synthesize AE-AgNPs, a solution of 1 mM AgNO<sub>3</sub> (Merck Laboratories, India) was prepared by  
119 adding 10 mL of the calyx aqueous extract to a 90 mL aqueous solution, and the mixture was left at  
120 room temperature. The color of the solution changed from pale yellow to brown, suggesting AgNP  
121 formation owing to the reaction between the extract of AE and silver metal ions. A control set was  
122 established by preparing a silver nitrate solution without adding calyx extract, which exhibited no color  
123 change. To purify the AE-AgNPs, the extract was removed by centrifugation three times at 15,000 rpm  
124 for 20 minutes and washed twice with double-sterilized water.

## 125 **2.5 Characterization studies**

126 Characterization of AgNPs from AE involved analyzing their physical and chemical properties.  
127 Initially, the conversion of silver ions in solution through bio-reduction was assessed by the visible  
128 alterations in color, which were subsequently tracked using UV-visible (UV-Vis) absorption  
129 spectroscopy. The functional groups that stabilized the biosynthesized nanoparticles were determined  
130 using Fourier transform infrared spectroscopy (FTIR), while energy-dispersive X-ray (EDX)  
131 examination revealed the existence of Ag metal in the sample. The synthesized AgNPs were  
132 transformed into a powder through freeze-drying, after which they were subjected to X-ray diffraction  
133 (XRD) analysis for crystalline phase identification. Finally, transmission electron microscopy (TEM)  
134 imaging was used to envisage the size and structure of the nanoparticles directly.

## 135 **2.6 Collection of parasites and *in vitro* treatments**

136 Freshly sacrificed domestic fowl (*Gallus gallus domesticus* L.) were examined for live mature  
137 *Raillietina* spp. These parasites were collected from local abattoirs in Cooch Behar, India and preserved  
138 in 0.9% phosphate-buffered saline (PBS) at  $37 \pm 1^{\circ}\text{C}$  in an incubator. Control parasites were kept in  
139 0.9% PBS without AE-AgNP at  $37 \pm 1^{\circ}\text{C}$  while treatment was performed by directly incubating live  
140 worms in varied concentrations (25, 50, 75, 100, 125  $\mu\text{g/ml}$ , 0.9% PBS) of AE-AgNP in separate Petri  
141 dishes. Genistein (GEN) was used as a broad-spectrum reference drug at 125  $\mu\text{g/ml}$  of PBS. Six  
142 replicates were prepared for each pair of incubation conditions, and the times required to reach the  
143 paralytic state and death were recorded. By removing the treated parasites from the test medium and  
144 immersing them in slightly warm water, parasite mortality was verified. Once all traces of movement  
145 had stopped, the times taken for paralysis and death were recorded. The treated and control parasites  
146 were primed further for histochemical localization and scanning electron microscopic studies.

## 147 **2.7 Scanning electron microscopic studies**

148 The paralyzed parasites were stored in neutral buffered formalin (10%) for 24 hours at  $4^{\circ}\text{C}$  for fixation.  
149 Those parasites were rinsed with PBS and dehydrated using gradually increasing acetone concentrations  
150 until completely dry. The specimens were then subjected to critical-point drying, and the resulting  
151 material was coated with platinum in an ion sputter (JFC-1100, JEOL). Finally, the parasite specimens

152 were visualized under a scanning electron microscope (EVO 18, Zeiss) at an accelerating voltage of 10-  
153 15 kV.

## 154 2.8 Histochemical localization of enzymes

155 The histochemical investigation was conducted on tegumental enzymes using frozen sections prepared  
156 and cut to 10-12  $\mu\text{m}$  in a cryostat (CM 3050S, Leica). The modified lead nitrate method detected acid  
157 phosphatase (AcPase) activity in specimens fixed with cold formol calcium (Pearse, 1968). The areas  
158 of AcPase activity were indicated by a brownish precipitate on the tegumental sections. Alkaline  
159 phosphatase (AlkPase) activity was detected at room temperature (17-20  $^{\circ}\text{C}$ ) using the modified  
160 coupling azo-dye method. The calcium method of Pearse was followed to locate adenosine  
161 triphosphatase (ATPase) activity, using adenosine triphosphate (ATP) as the substrate, and enzyme  
162 activity was identified by observing blackish-brown deposits (Pearse, 1968). The Wachstein and Meisel  
163 lead method detected 5'-Nucleotidase (5'-Nu) activity, with adenosine monophosphate as the substrate  
164 (Wachstein and Meisel, 1957).

## 165 3. Results and Discussion

### 166 3.1 Phytochemical screening of *A. esculentus*

| Phytochemical constituents | Tests                                     | Aqueous extract |
|----------------------------|-------------------------------------------|-----------------|
| Alkaloids                  | Mayer's test                              | +               |
| Saponins                   | Frothing test                             | +               |
| Glycosides                 | Keller-Killiani test, Legal's test        | -               |
| Tannins                    | Ferric chloride test                      | ++              |
| Flavonoids                 | Alkaline reagent test                     | ++              |
| Terpenoids                 | Concentrated $\text{H}_2\text{SO}_4$ test | ++              |
| Steroids                   | Liebermann-Burchard's test                | -               |
| Proteins                   | Millon's reagent, Burette's test          | ++              |

**Table 1.** Preliminary qualitative screening of the phytochemicals in the aqueous extracts of *A. esculentus* calyces

167 The data from the preliminary screening of *A. esculentus* calyx extracts indicated the presence of  
168 tannins, alkaloids, saponins, terpenoids, flavonoids, glycosides and proteins. These compounds may  
169 actively reduce silver ions to nanoparticles. In Table 1, the presence of phytomolecules is represented  
170 by a positive sign (+), their abundance by a double positive sign (++) and their absence by a negative  
171 sign (-). The phytochemical results showing the abundance of secondary metabolites are consistent  
172 with the findings of Refs. (Nortjie et al., 2022; Shaikh and Patil, 2020).

### 173 **3.2 Characterization of biosynthesized AgNPs**

#### 174 **3.2.1 UV-Visible Spectrophotometric Analysis.**

175 The formation of AgNPs was assessed by measuring the UV-Vis spectrum of the medium in the range  
176 of wavelength from 200 to 700 nm (Fig. 1A). AgNPs exhibit a characteristic absorption peak around  
177 425 nm for AgNPs in the UV-Vis spectrum, similar to previously reported results (Awwad and Salem,  
178 2012) and owes to the plasmon oscillation of silver to generate an electric field, known as surface  
179 plasmon resonance (SPR).

#### 180 **3.2.2 FTIR Analysis**

181 The FTIR spectrum of dried AgNPs was analyzed to determine the phytochemical constituents  
182 responsible for the capping of AgNPs by attributing the absorption bands with their corresponding  
183 compounds. The distinct peaks observed from the calyx extract of *A. esculentus* (Fig. 1B) are 3419  
184  $\text{cm}^{-1}$ , corresponding to O-H stretching vibration, which indicates the presence of alcohol, 2921  $\text{cm}^{-1}$   
185 to C-H stretching of an aromatic compound, 2360  $\text{cm}^{-1}$  to O-H stretching for carboxylic acid, 1647  
186  $\text{cm}^{-1}$  to C-C vibration and 1558  $\text{cm}^{-1}$  to N-H stretching vibration present as the stabilizing and capping  
187 agents, as reported in a previous study (Kurian et al., 2022). The peak at 1384  $\text{cm}^{-1}$  is attributed to C-  
188 O group, denoting carbonyl groups. The peak at 1033  $\text{cm}^{-1}$  designates aliphatic amines' C-N stretching  
189 vibration (Awwad and Salem, 2012). The FTIR results suggest that AgNPs were stabilized by terpenoid,  
190 alcohol, and carbonyl groups, providing strong binding sites for AgNPs. Thus, the FTIR results  
191 corroborate the presence of these biomolecules responsible for efficiently capping and stabilizing  
192 synthesized nanoparticles, which is consistent with previous studies (Zewde and Geremew, 2022)



193

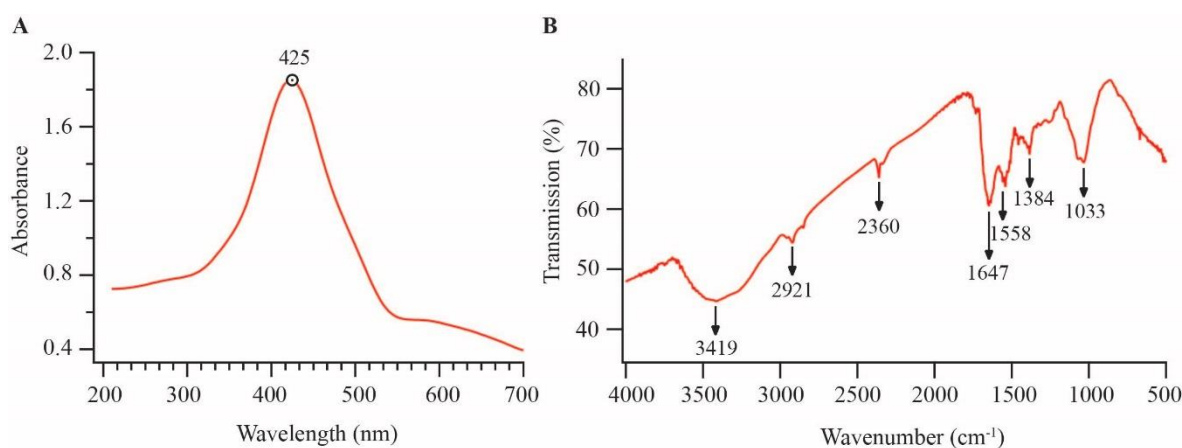

**Figure 1 A.** UV-Vis spectra of AgNPs synthesized from *A. esculentus* extract; **B.** FTIR spectrum of synthesized AgNPs from aqueous extract of *A. esculentus*.

### 194 3.2.3 Energy dispersive X-ray (EDX) analysis

195 The EDX spectrum obtained from the green synthesized AgNPs showed a peak (~3 keV) corresponding  
196 to elemental silver (Ag). The intensity of the EDX peak depends on the concentration of silver in the  
197 sample. The occurrence of the peak at 3 keV of EDX analysis is consistent with prior studies (Suba et  
198 al., 2022). Characteristic peaks of other elements like C and O, present in the sample, were also visible  
199 in the spectrum.

### 200 3.2.4 X-ray diffraction (XRD) analysis

201 The crystalline phase and size of the synthesized AgNPs were determined using X-ray diffraction  
202 (XRD). The sample was placed on an XRD grid, and the diffraction patterns were recorded for the 2 $\theta$   
203 range of 20 to 80 degrees with a step of 0.0202 degrees (Bruker d8 Advance X-ray diffractometer,  
204 CuK $\alpha$  radiation,  $\lambda = 1.5406 \text{ \AA}$ , 40 kV- 40 mA). XRD patterns revealed the presence of five major,  
205 distinct peaks at 38.33, 44.40, 64.53, and 77.49  $\text{\AA}$ , which correspond to the crystal planes (111), (200),  
206 (220), and (311) of silver, respectively. These peaks align with the powdered diffraction standard values  
207 of Miller indices (hkl) of the face-centered cubic (FCC) structure of silver (Fig. 3) and are consistent  
208 with the standard powder diffraction card of the Joint Committee on Powder Diffraction Standards  
209 (JCPDS) File No.: 04-0783 for silver (Gates-Rector and Blanton, 2019). The average size of the AgNPs  
210 was estimated using the Debye-Scherrer formula,  $D = 0.9\lambda/\beta \text{ Cos } \theta$ , where  $\lambda$  is the wavelength of the

211 X-rays used for diffraction and  $\beta$  denotes the full width at half maximum (FWHM) of a peak. Based on  
212 the XRD spectrum of the AE-AgNP, the average AgNP size was 39.78 nm. A few unassigned peaks  
213 were detected, which may have been caused by the existence of bioorganic compounds or proteins in  
214 the extracts that crystallized on the surface of the AgNP (Sharma et al., 2022). In a similar observation,  
215 the AgNPs synthesized from the flower extract of *Mangifera indica* also showed a similar pattern of  
216 peaks in XRD analysis (Ameen et al., 2019).

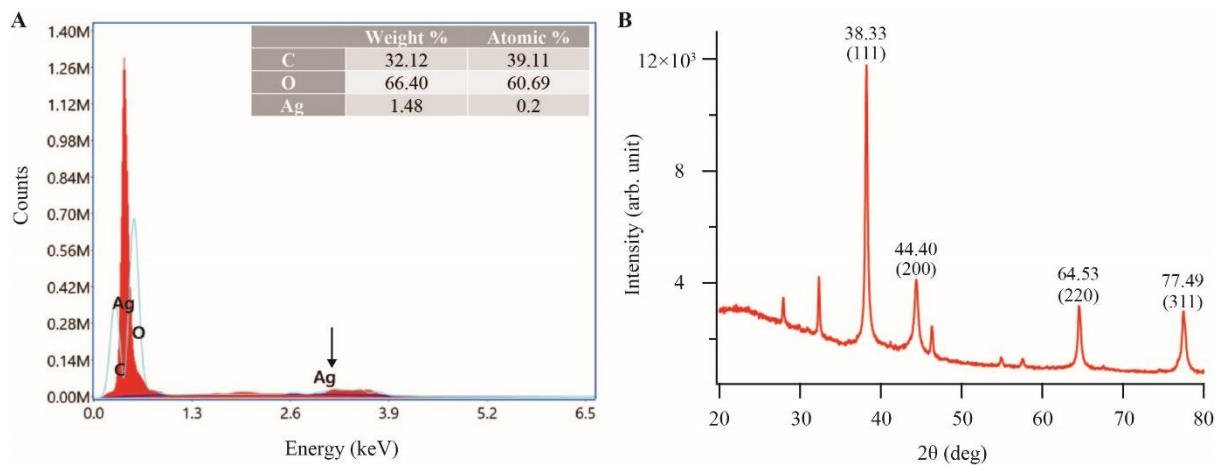

217

218 **Figure 2.** Energy dispersive X-ray spectroscopic spectrum (A) and X-ray diffraction pattern (B) of the  
219 biosynthesized AE-AgNPs.

### 220 3.2.5. Transmission electron microscopic (TEM) analysis

221 The particle size and crystalline state of the biosynthesized material were analyzed by TEM (JEM -  
222 2100 HR, JEOL). Before the analysis, the sample was mixed with ethanol and ultrasonicated for 15  
223 minutes to prepare a suspension which was then put on the copper grid and dried at 25°C (room  
224 temperature). Later it was positioned on a holder (specimen) for TEM analysis. The TEM images  
225 showed that the AgNPs were mostly spherical, with an average size of  $33.24 \pm 2.57$  nm, consistent with  
226 the particle size range of AgNPs from *Ricinus communis* (Gul et al., 2021). A Gaussian data fit (Fig.  
227 3B, black curve) to the histogram of the empirically measured particle size was performed to extract  
228 the average nanoparticle diameter and its spread due to the inhomogeneity of the nanoparticle sizes.

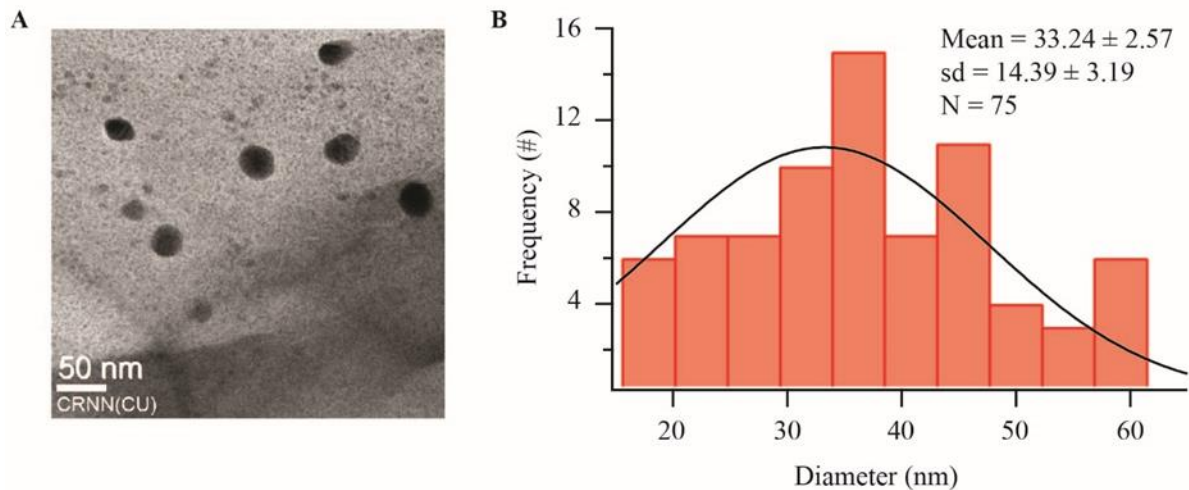

229

230 **Figure 3 A.** A typical TEM micrographic image of synthesized AgNPs. **B.** AgNPs size distribution  
231 extracted from TEM images. The solid black curve is a Gaussian fit to the data.

### 232 3.2 Efficacy of AE-AgNP on *Raillietina* spp.

233 *Raillietina* spp. incubated in the control media (PBS alone) demonstrated physical activity for longer  
234 duration; the controls survived for approximately  $72.00 \pm 0.04$  h until becoming paralyzed and dead  
235 (Table 1; Fig. 4). When exposed to the test media (AE-AgNP and Genistein), the parasites transitioned

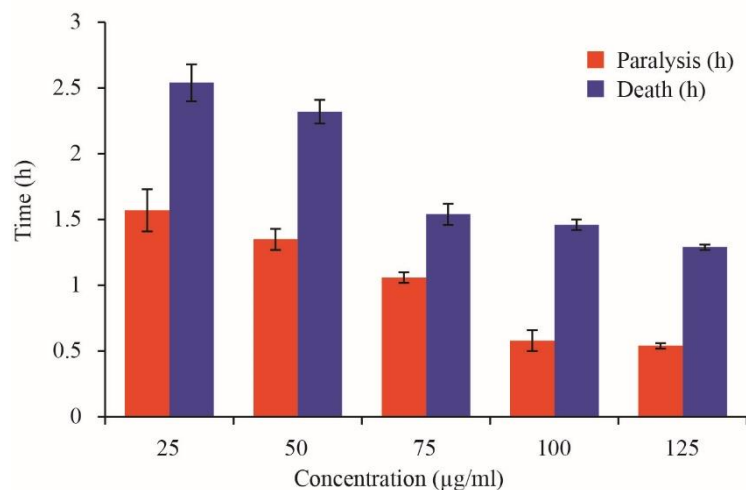

**Figure 4.** Results of AE-AgNP efficacy on *Raillietina* spp. after exposure to five different concentrations (25 µg/ml, 50 µg/ml, 75 µg/ml, 100 µg/ml and 125 µg/ml PBS).

236 from a strong movement activity to a relaxed state, then to paralysis and death. With dosages of 25, 50,  
237 75, 100, and 125µg/ml PBS, respectively, the paralysis time was 1.57 h, 1.35 h, 1.06 h, 0.58 h, 0.54 h,  
238 and the death time was 2.54 h, 2.32 h, 1.54 h, 1.46 h, 1.29 h. A similar study showed that *Alpinia nigra*,

239 a folklore plant used by the Tripuri tribe in North-East India, possesses significant anticestodal efficacy  
240 in a dose-dependent manner (Roy and Swargiary, 2009).

| Test material | Concentration ( $\mu\text{g/ml}$ PBS) | Paralysis (h)   | Death (h)       |
|---------------|---------------------------------------|-----------------|-----------------|
| Control       | –                                     | $72 \pm 0.06$   |                 |
| AE-AgNP       | 25                                    | $1.57 \pm 0.16$ | $2.54 \pm 0.14$ |
|               | 50                                    | $1.35 \pm 0.08$ | $2.32 \pm 0.09$ |
|               | 75                                    | $1.06 \pm 0.04$ | $1.54 \pm 0.08$ |
|               | 100                                   | $0.58 \pm 0.08$ | $1.46 \pm 0.04$ |
|               | 125                                   | $0.54 \pm 0.02$ | $1.29 \pm 0.02$ |
| Genistein     | 125                                   | $0.53 \pm 0.02$ | $1.26 \pm 0.03$ |

241 **Table 2.** *In vitro* efficacy of AE-AgNPs and reference drug Genistein on *Raillietina* spp.

### 242 3.3 Morphological changes of AE-AgNP exposed *Raillietina* spp.

243 The *Raillietina* spp. is a long, segmented worm with distinct body regions, including the scolex (head),  
244 neck, and strobila (body proper). The scolex possesses four suckers and a rostellum, which are used for  
245 attachment. The proglottids, individual segments of the strobila, are covered in hair-like structures  
246 called microtriches that serve as the absorptive structures for feeding. Scanning electron microscopy  
247 (SEM) images show that the suckers on the scolex are arranged in a sideways pattern, with broad hooks  
248 at the base that tapers towards the end. The proglottids have a smooth, velvety appearance due to the  
249 unidirectional orientation of the microtriches covering their surface. However, when exposed to test  
250 media, the surface topography of the proglottids degenerated, resulting in the formation of wrinkles and  
251 erosion of the spines around the suckers, which altered the host-parasite interface. Treatment with  
252 Genistein, a reference drug, caused significant damage to the scolex and the tegumental surface  
253 structures, leading to their breakage and detachment. In a similar study, on incubating the cestodes with

254 the root-peel extract of *Potentilla fulgens*, the parasites exhibited complete attrition of microtriches from  
255 the tegument, disintegration of muscle bundles and cellular organelles (Roy et al., 2012).

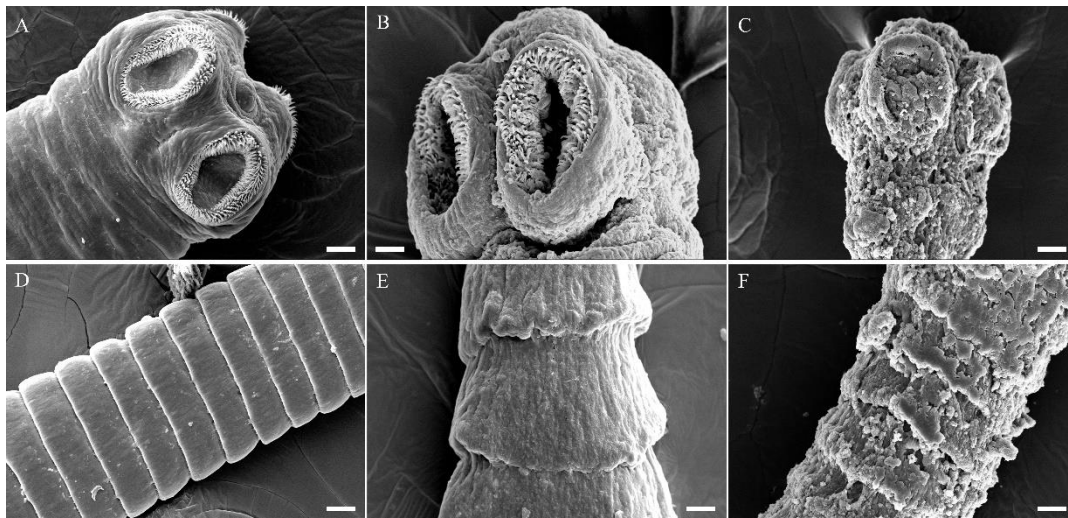

256

257 **Figure 5.** Scanning electron micrographs of control worm (**A** - scolex, **D** - gravid proglottid); Genistein  
258 (**B** - scolex, **E** - gravid proglottid) and silver nanoparticle exposed *Raillietina* spp. (**C** - scolex, **F** - gravid  
259 proglottid). All scale bars correspond to 20  $\mu$ m.

### 260 3.4 Histochemical studies

261 The activity of AcPase, AlkPase, ATPase, and 5'-Nu was most intense in the tegument (T) of control  
262 *Raillietina* spp. as compared to the sub-tegument (ST) and somatic musculature (SM), as shown in Figs.  
263 6A-D. The parasites exposed to AE-AgNP revealed a general reduction in staining intensity in the T,  
264 ST, and SM, while no activity was visible in parenchyma cells (P), as seen in Figs. 6E-H. Specifically,  
265 the staining intensity of AcPase was significantly reduced in the T and ST regions of the AgNP-  
266 incubated section (Figs. 6A, E), whereas the activity throughout the section of parasites exposed to  
267 Genistein was minimal (Figs. 6I-L). AlkPase activity was also greatly diminished throughout the treated  
268 sections of the parasite (Figs. 6B, F), and ATPase activity was almost imperceptible in the parasite's T,  
269 ST, SM and P treated with AE-AgNP compared to control parasites (Figs. 6C, G). Finally, 5'-Nu  
270 activity was also reduced along the T, ST and SM region in the AgNP-exposed cestodes compared to  
271 the control (Figs. 6D, H). Histochemical studies have evaluated the parasite's localization and  
272 expression of specific enzymes and metabolic pathways in response to phytochemical treatment.  
273 Another study revealed potential antitrematocidal activity by *Senna* leaf extracts against  
274 *Paramphistomum gracile* by altering tegument architecture and inhibiting tegumental enzyme activity

275 (Roy and Lyndem, 2019). Phytochemicals such as  $\alpha$ -viniferin altered the tegumental morphology of  
276 the treated parasites, reducing the tegumental enzyme's activities (Roy and Giri, 2015). Another study  
277 observed a decrease in the levels of phosphatases and trace elements on exposure to crude ethanol  
278 extract of ethnomedicinal plants *Acacia oxyphylla* and *Securinega virosa*, compared to control groups  
279 (Dasgupta et al., 2013).

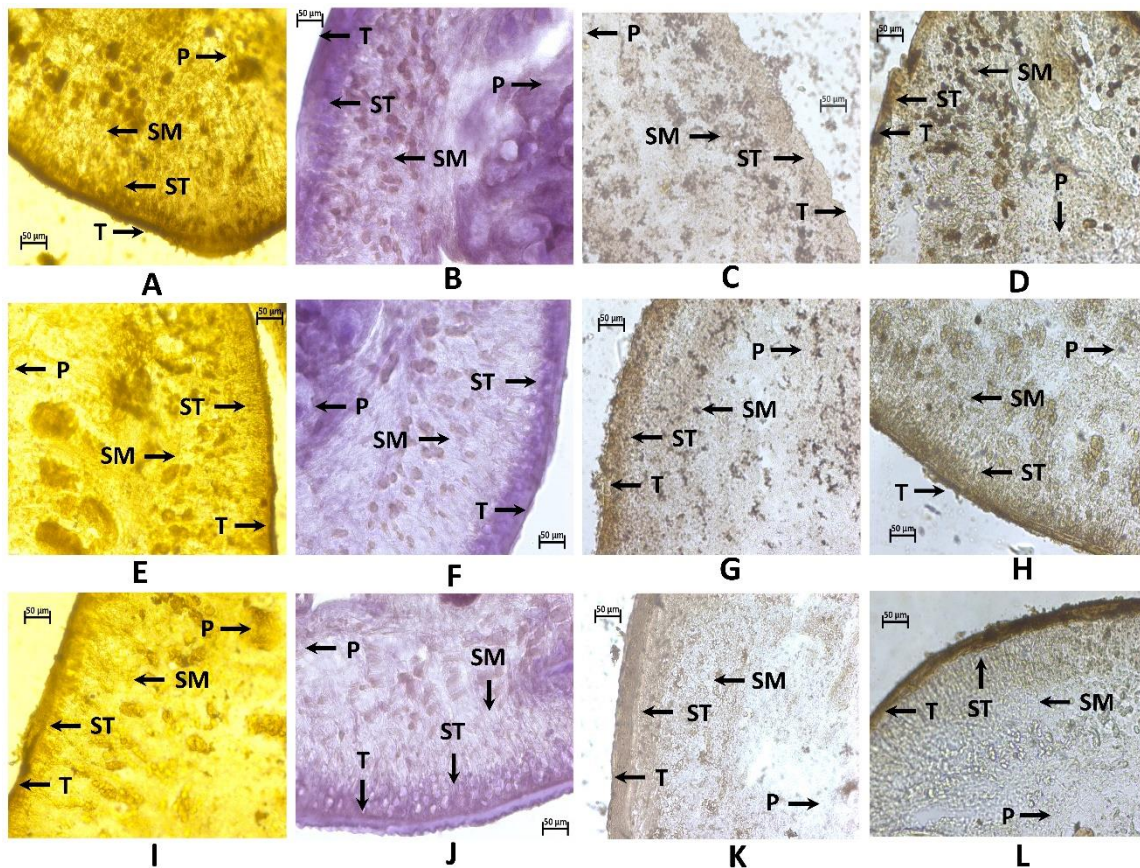

280  
281 **Figure 6.** Histochemical demonstration of AcPase (A, E, I), AlkPase (B, F, J), ATPase (C, G, K) and  
282 5'-Nu (D, H, L) activities in *Raillietina* spp. treated with AE-AgNP (125 µg/ml) and Genistein GEN  
283 (125 µg/ml); A-D: Transverse section of control parasite; E-H: AgNPs -exposed parasite; I-L: GEN-  
284 exposed parasite. All scale bars correspond to 50 µm.

## 285 Conclusion

286 The study describes a green synthesis method for AgNPs using an extract from *Abelmoschus esculentus*.  
287 The biosynthesized AgNPs were spherical, had a 30-35 nm size range, and showed significant  
288 anthelmintic activity against the model cestode. Electron microscopy and histochemical studies have

289 provided important insights into the mechanism of action of phytochemicals and helped identify  
290 potential targets for anthelmintic therapy. These studies have provided important implications for  
291 developing alternative and more sustainable approaches to controlling parasitic cestode infections in  
292 poultry. Green synthesized anthelmintics can be safer and more effective and are less likely to have  
293 harmful side effects or produce resistant strains of helminths. The plant extracts used in green synthesis  
294 have cultural significance in ethnomedicinal practices, and using these extracts to synthesize  
295 anthelmintics can help preserve traditional knowledge and promote cultural diversity. This study  
296 illustrates the possibility of using plant derivatives for the biosynthesis of AgNPs and enunciates the  
297 need to develop environmentally benign methods for synthesizing nanomaterials.

### 298 **Authorship contribution statement**

299 Rima Majumdar: Writing - original draft, conceptualization, investigation and data analysis.

300 Pradip Kumar Kar: Experiment - designing, Writing - review and editing, supervision.

### 301 **Acknowledgments**

302 The authors thank Dr. Debkumar Mukhopadhyay, Vice-Chancellor of CBPBU, for his valuable support,  
303 encouragement, and provision of essential laboratory facilities. Furthermore, the authors thank the  
304 UGC-DAE Consortium in Kolkata for providing the XRD facility and the Centre of Nanoscience and  
305 Nanotechnology (CRNN) in Kolkata for granting permission to utilize their SEM, TEM, and FTIR  
306 facility.

### 307 **References:**

- 308 Alves, S. M., et al., 2018. The efficacy of a lectin from *Abelmoschus Esculentus* depends on central  
309 opioid receptor activation to reduce temporomandibular joint hypernociception in rats.  
310 *Biomedicine & Pharmacotherapy*. 101, 478-484.
- 311 Ameen, F., et al., 2019. Phytosynthesis of silver nanoparticles using *Mangifera indica* flower extract as  
312 bioreductant and their broad-spectrum antibacterial activity. *Bioorganic Chemistry*. 88,  
313 102970.
- 314 Amemor, E., et al., 2021. Efficacy of Levamisole, Piperazine and their Combination in the Control of  
315 Gastrointestinal Worms in Guinea Fowl. *Nigerian Journal of Parasitology*. 42, 326-331.
- 316 Ash, A., et al., 2017. Ultrastructural changes in *Raillietina* (Platyhelminthes: cestoda), exposed to  
317 sulfonoquinovosyldiacylglyceride (SQDG), isolated from Neem (*Azadirachta indica*). *Natural*  
318 *Product Research*. 31, 2445-2449.

- 319 Awwad, A. M., Salem, N. M., 2012. Green synthesis of silver nanoparticles by Mulberry Leaves Extract.  
320 Nanoscience and Nanotechnology. 2, 125-128.
- 321 Dasgupta, S., et al., 2013. Effects of *Acacia oxyphylla* and *Securinega virosa* on functional  
322 characteristics of *Raillietina echinobothrida* (Phylum: Platyhelminthes; Class: Cestoidea), a  
323 poultry cestode parasite. Journal of Parasitic Diseases. 37, 125-130.
- 324 Elkhalfifa, A. E. O., et al., 2021. Okra (*Abelmoschus esculentus*) as a potential dietary medicine with  
325 nutraceutical importance for sustainable health applications. Molecules. 26, 696.
- 326 Gao, P., et al., 2021. Determination of Levamisole and Mebendazole and Its Two Metabolite Residues  
327 in Three Poultry Species by HPLC-MS/MS. Foods. 10, 2841.
- 328 Gates-Rector, S., Blanton, T., 2019. The powder diffraction file: a quality materials characterization  
329 database. Powder Diffraction. 34, 352-360.
- 330 Giri, K., et al., 2021. Evaluation of Antihelmintic Activity of Indigenous Plants Found in India Including  
331 *Butea monosperma*, *Origanum majorana*, *Piper longum* and *Embelia ribes* And GC-MS  
332 Phytochemical Analysis of Plant Extracts. Pharmacognosy Journal. 13.
- 333 Gul, A., et al., 2021. Green synthesis, characterization, enzyme inhibition, antimicrobial potential, and  
334 cytotoxic activity of plant mediated silver nanoparticle using *Ricinus communis* leaf and root  
335 extracts. Biomolecules. 11, 206.
- 336 Hrckova, G., et al., 2013. Parasitic helminths of humans and animals: health impact and control.  
337 Pharmacological Potential of Selected Natural Compounds in the Control of Parasitic Diseases.  
338 29-99.
- 339 Juan Carlos, F.-A., et al., 2020. Antimicrobial poly (methyl methacrylate) with silver nanoparticles for  
340 dentistry: A systematic review. Applied Sciences. 10, 4007.
- 341 Kar, P. K., et al., 2014. Anthelmintic efficacy of gold nanoparticles derived from a phytopathogenic  
342 fungus, *Nigrospora oryzae*. PloS One. 9, e84693.
- 343 Kombaiah, K., et al., 2018. Okra extract-assisted green synthesis of CoFe<sub>2</sub>O<sub>4</sub> nanoparticles and their  
344 optical, magnetic, and antimicrobial properties. Materials Chemistry and Physics. 204, 410-  
345 419.
- 346 Kurian, J. T., et al., 2022. Synthesis of Inorganic Nanoparticles Using Traditionally Used Indian  
347 Medicinal Plants. Journal of Cluster Science. 1-27.
- 348 Liu, Y., et al., 2021. Okra in food field: Nutritional value, health benefits and effects of processing  
349 methods on quality. Food Reviews International. 37, 67-90.
- 350 Mamillapalli, V., 2016. Nanoparticles for herbal extracts. Asian Journal of Pharmaceutics. 10.
- 351 Mubayi, A., et al., 2012. Evidence based green synthesis of nanoparticles. Advanced Materials Letters.  
352 3, 519-525.
- 353 Namivandi-Zangeneh, R., et al., 2021. Synthetic antimicrobial polymers in combination therapy:  
354 tackling antibiotic resistance. ACS Infectious Diseases. 7, 215-253.
- 355 Nortjie, E., et al., 2022. Extraction methods, quantitative and qualitative phytochemical screening of  
356 medicinal plants for antimicrobial textiles: a review. Plants. 11, 2011.
- 357 Ogunsona, E. O., et al., 2020. Engineered nanomaterials for antimicrobial applications: A review.  
358 Applied Materials Today. 18, 100473.
- 359 Pearse, A. G. E., 1968. Histochemistry, theoretical and applied: theoretical and applied. Churchill  
360 Livingstone.
- 361 Rai, S., et al., 2022. Concepts on smart nano-based drug delivery system. Recent Patents on  
362 Nanotechnology. 16, 67-89.
- 363 Rajeshkumar, S., Bharath, L., 2017. Mechanism of plant-mediated synthesis of silver nanoparticles—a  
364 review on biomolecules involved, characterisation and antibacterial activity. Chemo-  
365 biological Interactions. 273, 219-227.
- 366 Romdhane, M. H., et al., 2020. Chemical composition, nutritional value, and biological evaluation of  
367 Tunisian okra pods (*Abelmoschus esculentus* L. Moench). Molecules. 25, 4739.



- 368 Roy, B., et al., 2012. Electron microscopic observations on the alterations of tegumental surface of  
369 *Raillietina echinobothrida* treated with root-peel extract of *Potentilla fulgens*. *Microscopy*  
370 *Research and Technique*. 75, 1000-1005.
- 371 Roy, B., Giri, B. R., 2015.  $\alpha$ -Viniferin-induced structural and functional alterations in *Raillietina*  
372 *echinobothrida*, a poultry tapeworm. *Microscopy and Microanalysis* 21, 377-384.
- 373 Roy, B., Swargiary, A., 2009. Anthelmintic efficacy of ethanolic shoot extract of *Alpinia nigra* on  
374 tegumental enzymes of *Fasciolopsis buski*, a giant intestinal parasite. *Journal of Parasitic*  
375 *Diseases*. 33, 48-53.
- 376 Roy, S., Lyndem, L. M., 2019. An *in vitro* confirmation of the ethonopharmacological use of *Senna*  
377 plants as anthelmintic against rumen fluke *Paramphistomum gracile*. *BMC Veterinary*  
378 *Research*. 15, 1-17.
- 379 Saemi Soudkolaei, A., et al., 2021. Anthelmintic efficacy of fenbendazole and levamisole in native fowl  
380 in northern Iran. *Parasites & Vectors*. 14, 1-8.
- 381 Sarba, E. J., et al., 2019. Gastrointestinal helminths of backyard chickens in selected areas of West  
382 Shoa Zone Central, Ethiopia. *Veterinary Parasitology: Regional Studies and Reports*. 15,  
383 100265.
- 384 Shaikh, J. R., Patil, M., 2020. Qualitative tests for preliminary phytochemical screening: An overview.  
385 *International Journal of Chemical Studies*. 8, 603-608.
- 386 Sharma, N. K., et al., 2022. Green Route Synthesis and Characterization Techniques of Silver  
387 Nanoparticles and Their Biological Adeptness. *ACS Omega*. 7, 27004-27020.
- 388 Shelke, P. S., et al., 2020. *In-vitro* anthelmintic activity of *Boswellia serrata* and *Aloe barbadensis*  
389 extracts on *Pheretima posthuma*: Indian earthworm. *International Journal of Research in*  
390 *Medical Sciences*. 8, 1843-7.
- 391 Spirescu, V. A., et al., 2021. Inorganic nanoparticles and composite films for antimicrobial therapies.  
392 *International Journal of Molecular Sciences*. 22, 4595.
- 393 Suba, S., et al., 2022. Eco synthesized silver nanoparticles as a next generation of nanoprodukt in  
394 multidisciplinary applications. *Environmental Chemistry and Ecotoxicology*. 4, 13-19.
- 395 Verbitskaya, L., Olechnovich, N., 2007. Anthelmintic properties of a wormwood bitter at sheeps  
396 intestinal helminthosis. Ученые записки Витебской государственной академии  
397 ветеринарной медицины (Belarus). *Scientific Papers of the Vitebsk State Academy of*  
398 *Veterinary Medicine*.
- 399 Wachstein, M., Meisel, E., 1957. Histochemistry of hepatic phosphatases at a physiologic pH: With  
400 special reference to the demonstration of bile canaliculi. *American Journal of Clinical*  
401 *Pathology*. 27, 13-23.
- 402 Yora, M., et al., 2018. Characterization of phytochemicals and yield components in various okra  
403 (*Abelmoschus esculentus*) genotypes. *Biodiversitas Journal of Biological Diversity*. 19, 2323-  
404 2328.
- 405 Zahedi, S., et al., 2022. Occurrence of veterinary drugs and resistance genes during anaerobic digestion  
406 of poultry and cattle manures. *Science of The Total Environment*. 822, 153477.
- 407 Zewde, D., Geremew, B., 2022. Biosynthesis of ZnO nanoparticles using *Hagenia abyssinica* leaf  
408 extracts; their photocatalytic and antibacterial activities. *Environmental Pollutants and*  
409 *Bioavailability*. 34, 224-235.
